# Supplementary material for: Associations of Peripheral Artery Disease With Calf Skeletal Muscle Mitochondrial DNA Heteroplasmy
Source: PubMed Central journal article supplement — J Am Heart Assoc. 2020 Mar 21;9(7):e015197. doi: 10.1161/JAHA.119.015197 (PMC7428597; doi:10.1161/jaha.119.015197), 2020-03-21

# **SUPPLEMENTAL MATERIAL**

**Table S1. mtDNA variants observed in participants with muscle biopsy (n = 44).**

*[Please see excel spreadsheet.]*

**Table S2. Coefficients from mixed effect models estimating the difference in heteroplasmy rate (heteroplasmy count per base) across mtDNA regions among study participants (n = 42) adjusted for age, sex, PAD and Diabetes status. The same model is estimated in each column with a different mtDNA region used as the reference region and indicated in the top row.**

| Coefficient | D-loop                                              |                 | rRNA                                               |                 | ND 1-6                                             |                 | COX 1-3                                            |                 |
|-------------|-----------------------------------------------------|-----------------|----------------------------------------------------|-----------------|----------------------------------------------------|-----------------|----------------------------------------------------|-----------------|
|             | $\beta$ (se)                                        | p               | $\beta$ (se)                                       | p               | $\beta$ (se)                                       | p               | $\beta$ (se)                                       | p               |
| (Intercept) | <b>1.01×10<sup>-2</sup> (6.19×10<sup>-4</sup>)</b>  | <b>&lt;.001</b> | 2.38×10 <sup>-4</sup> (6.19×10 <sup>-4</sup> )     | 0.702           | 5.92×10 <sup>-4</sup> (6.19×10 <sup>-4</sup> )     | 0.342           | -8.69×10 <sup>-5</sup> (6.19×10 <sup>-4</sup> )    | 0.889           |
| D-loop      |                                                     |                 | <b>9.83×10<sup>-3</sup> (5.01×10<sup>-4</sup>)</b> | <b>&lt;.001</b> | <b>9.48×10<sup>-3</sup> (5.01×10<sup>-4</sup>)</b> | <b>&lt;.001</b> | <b>1.02×10<sup>-2</sup> (5.01×10<sup>-4</sup>)</b> | <b>&lt;.001</b> |
| rRNA        | <b>-9.83×10<sup>-3</sup> (5.01×10<sup>-4</sup>)</b> | <b>&lt;.001</b> |                                                    |                 | -3.55×10 <sup>-4</sup> (5.01×10 <sup>-4</sup> )    | 0.480           | 3.25×10 <sup>-4</sup> (5.01×10 <sup>-4</sup> )     | 0.518           |
| ND 1-6      | <b>-9.48×10<sup>-3</sup> (5.01×10<sup>-4</sup>)</b> | <b>&lt;.001</b> | 3.55×10 <sup>-4</sup> (5.01×10 <sup>-4</sup> )     | 0.480           |                                                    |                 | 6.79×10 <sup>-4</sup> (5.01×10 <sup>-4</sup> )     | 0.176           |
| COX 1-3     | <b>-1.02×10<sup>-2</sup> (5.01×10<sup>-4</sup>)</b> | <b>&lt;.001</b> | -3.25×10 <sup>-4</sup> (5.01×10 <sup>-4</sup> )    | 0.518           | -6.79×10 <sup>-4</sup> (5.01×10 <sup>-4</sup> )    | 0.176           |                                                    |                 |
| ATP 8/6     | <b>-1.00×10<sup>-2</sup> (5.01×10<sup>-4</sup>)</b> | <b>&lt;.001</b> | -2.05×10 <sup>-4</sup> (5.01×10 <sup>-4</sup> )    | 0.683           | -5.60×10 <sup>-4</sup> (5.01×10 <sup>-4</sup> )    | 0.265           | 1.19×10 <sup>-4</sup> (5.01×10 <sup>-4</sup> )     | 0.812           |
| Cyt b       | <b>-7.39×10<sup>-3</sup> (5.01×10<sup>-4</sup>)</b> | <b>&lt;.001</b> | <b>2.45×10<sup>-3</sup> (5.01×10<sup>-4</sup>)</b> | <b>&lt;.001</b> | <b>2.09×10<sup>-3</sup> (5.01×10<sup>-4</sup>)</b> | <b>&lt;.001</b> | <b>2.77×10<sup>-3</sup> (5.01×10<sup>-4</sup>)</b> | <b>&lt;.001</b> |
| tRNA        | <b>-9.83×10<sup>-3</sup> (5.01×10<sup>-4</sup>)</b> | <b>&lt;.001</b> | 3.53×10 <sup>-7</sup> (5.01×10 <sup>-4</sup> )     | 0.999           | -3.54×10 <sup>-4</sup> (5.01×10 <sup>-4</sup> )    | 0.480           | 3.25×10 <sup>-4</sup> (5.01×10 <sup>-4</sup> )     | 0.517           |
| Age*        | -9.41×10 <sup>-5</sup> (3.77×10 <sup>-4</sup> )     | 0.804           | -9.41×10 <sup>-5</sup> (3.77×10 <sup>-4</sup> )    | 0.804           | -9.41×10 <sup>-5</sup> (3.77×10 <sup>-4</sup> )    | 0.804           | -9.41×10 <sup>-5</sup> (3.77×10 <sup>-4</sup> )    | 0.804           |
| Male        | -2.14×10 <sup>-4</sup> (5.21×10 <sup>-4</sup> )     | 0.683           | -2.14×10 <sup>-4</sup> (5.21×10 <sup>-4</sup> )    | 0.683           | -2.14×10 <sup>-4</sup> (5.21×10 <sup>-4</sup> )    | 0.683           | -2.14×10 <sup>-4</sup> (5.21×10 <sup>-4</sup> )    | 0.683           |
| PAD         | <b>2.13×10<sup>-3</sup> (6.37×10<sup>-4</sup>)</b>  | <b>0.002</b>    | <b>2.13×10<sup>-3</sup> (6.37×10<sup>-4</sup>)</b> | <b>0.002</b>    | <b>2.13×10<sup>-3</sup> (6.37×10<sup>-4</sup>)</b> | <b>0.002</b>    | <b>2.13×10<sup>-3</sup> (6.37×10<sup>-4</sup>)</b> | <b>0.002</b>    |
| Diabetes    | -9.31×10 <sup>-4</sup> (4.91×10 <sup>-4</sup> )     | 0.065           | -9.31×10 <sup>-4</sup> (4.91×10 <sup>-4</sup> )    | 0.065           | -9.31×10 <sup>-4</sup> (4.91×10 <sup>-4</sup> )    | 0.065           | -9.31×10 <sup>-4</sup> (4.91×10 <sup>-4</sup> )    | 0.065           |

| Coefficient | ATP8/6                                             |                 | Cytb                                                |                 | tRNA                                               |                 |
|-------------|----------------------------------------------------|-----------------|-----------------------------------------------------|-----------------|----------------------------------------------------|-----------------|
|             | $\beta$ (se)                                       | p               | $\beta$ (se)                                        | p               | $\beta$ (se)                                       | p               |
| (Intercept) | 3.26×10 <sup>-5</sup> (6.19×10 <sup>-4</sup> )     | 0.958           | <b>2.68×10<sup>-3</sup> (6.19×10<sup>-4</sup>)</b>  | <b>&lt;.001</b> | 2.38×10 <sup>-4</sup> (6.19×10 <sup>-4</sup> )     | 0.702           |
| D-loop      | <b>1.00×10<sup>-2</sup> (5.01×10<sup>-4</sup>)</b> | <b>&lt;.001</b> | <b>7.39×10<sup>-3</sup> (5.01×10<sup>-4</sup>)</b>  | <b>&lt;.001</b> | <b>9.83×10<sup>-3</sup> (5.01×10<sup>-4</sup>)</b> | <b>&lt;.001</b> |
| rRNA        | 2.05×10 <sup>-4</sup> (5.01×10 <sup>-4</sup> )     | 0.683           | <b>-2.45×10<sup>-3</sup> (5.01×10<sup>-4</sup>)</b> | <b>&lt;.001</b> | -3.53×10 <sup>-7</sup> (5.01×10 <sup>-4</sup> )    | 0.999           |
| ND 1-6      | 5.60×10 <sup>-4</sup> (5.01×10 <sup>-4</sup> )     | 0.265           | <b>-2.09×10<sup>-3</sup> (5.01×10<sup>-4</sup>)</b> | <b>&lt;.001</b> | 3.54×10 <sup>-4</sup> (5.01×10 <sup>-4</sup> )     | 0.480           |
| COX 1-3     | -1.19×10 <sup>-4</sup> (5.01×10 <sup>-4</sup> )    | 0.812           | <b>-2.77×10<sup>-3</sup> (5.01×10<sup>-4</sup>)</b> | <b>&lt;.001</b> | -3.25×10 <sup>-4</sup> (5.01×10 <sup>-4</sup> )    | 0.517           |
| ATP 8/6     |                                                    |                 | <b>-2.65×10<sup>-3</sup> (5.01×10<sup>-4</sup>)</b> | <b>&lt;.001</b> | -2.05×10 <sup>-4</sup> (5.01×10 <sup>-4</sup> )    | 0.682           |
| Cyt b       | <b>2.65×10<sup>-3</sup> (5.01×10<sup>-4</sup>)</b> | <b>&lt;.001</b> |                                                     |                 | <b>2.45×10<sup>-3</sup> (5.01×10<sup>-4</sup>)</b> | <b>&lt;.001</b> |
| tRNA        | 2.05×10 <sup>-4</sup> (5.01×10 <sup>-4</sup> )     | 0.682           | <b>-2.45×10<sup>-3</sup> (5.01×10<sup>-4</sup>)</b> | <b>&lt;.001</b> |                                                    |                 |
| Age*        | -9.41×10 <sup>-5</sup> (3.77×10 <sup>-4</sup> )    | 0.804           | -9.41×10 <sup>-5</sup> (3.77×10 <sup>-4</sup> )     | 0.804           | -9.41×10 <sup>-5</sup> (3.77×10 <sup>-4</sup> )    | 0.804           |
| Male        | -2.14×10 <sup>-4</sup> (5.21×10 <sup>-4</sup> )    | 0.683           | -2.14×10 <sup>-4</sup> (5.21×10 <sup>-4</sup> )     | 0.683           | -2.14×10 <sup>-4</sup> (5.21×10 <sup>-4</sup> )    | 0.683           |
| PAD         | <b>2.13×10<sup>-3</sup> (6.37×10<sup>-4</sup>)</b> | <b>0.002</b>    | <b>2.13×10<sup>-3</sup> (6.37×10<sup>-4</sup>)</b>  | <b>0.002</b>    | <b>2.13×10<sup>-3</sup> (6.37×10<sup>-4</sup>)</b> | <b>0.002</b>    |
| Diabetes    | -9.31×10 <sup>-4</sup> (4.91×10 <sup>-4</sup> )    | 0.065           | -9.31×10 <sup>-4</sup> (4.91×10 <sup>-4</sup> )     | 0.065           | -9.31×10 <sup>-4</sup> (4.91×10 <sup>-4</sup> )    | 0.065           |

**Table S3. Coefficients from multivariable linear regression models estimating the association between the natural log of mtDNA heteroplasmy count and PAD status by mtDNA region and frequency after exclusion of participants with non-diabetes comorbidities\* (n = 30).**

| Coefficient | All                |              | All                         |              | High frequency heteroplasmy |       | D-loop       |       | Gene region        |              |
|-------------|--------------------|--------------|-----------------------------|--------------|-----------------------------|-------|--------------|-------|--------------------|--------------|
|             | Microheteroplasmy  |              | High frequency heteroplasmy |              | D-loop                      |       | Gene region  |       |                    |              |
|             | $\beta$ (se)       | p            | $\beta$ (se)                | p            | $\beta$ (se)                | p     | $\beta$ (se) | p     |                    |              |
| (Intercept) | 2.89 (0.26)        | <.001        | 2.77 (0.26)                 | <.001        | 0.33 (0.56)                 | 0.570 | 2.04 (0.30)  | <.001 | 2.29 (0.30)        | <.001        |
| PAD         | <b>0.70 (0.25)</b> | <b>0.010</b> | <b>0.68 (0.26)</b>          | <b>0.013</b> | -0.35 (0.55)                | 0.533 | 0.55 (0.29)  | 0.067 | <b>0.79 (0.29)</b> | <b>0.012</b> |
| Age†        | 0.01 (0.16)        | 0.974        | 0.04 (0.16)                 | 0.802        | -0.44 (0.35)                | 0.230 | 0.02 (0.19)  | 0.931 | 0.04 (0.19)        | 0.831        |
| Male        | 0.08 (0.21)        | 0.699        | 0.07 (0.21)                 | 0.750        | 0.11 (0.45)                 | 0.807 | -0.17 (0.24) | 0.476 | 0.22 (0.24)        | 0.362        |
| Black       | 0.14 (0.21)        | 0.510        | 0.04 (0.21)                 | 0.869        | 0.88 (0.46)                 | 0.066 | 0.10 (0.24)  | 0.670 | 0.18 (0.24)        | 0.460        |
| Diabetes    | -0.29 (0.21)       | 0.183        | -0.25 (0.22)                | 0.263        | 0.02 (0.47)                 | 0.969 | -0.31 (0.24) | 0.218 | -0.36 (0.25)       | 0.159        |

\* Angina, myocardial infarction, heart failure or pulmonary disease.

†Age centered at 70 years and scaled to 10 years.

**Table S4. Coefficients from multivariable linear regression models estimating the association between heteroplasmy count or copy number and ABI as well as measures of walking performance among participants with PAD (n = 33).**

| Coefficient              | ABI           |       | Normal<br>4-meter walk speed |       | Rapid<br>4-meter walk speed |       | 6-minute walk distance |       |
|--------------------------|---------------|-------|------------------------------|-------|-----------------------------|-------|------------------------|-------|
|                          | $\beta$ (se)  | p     | $\beta$ (se)                 | p     | $\beta$ (se)                | p     | $\beta$ (se)           | p     |
| (Intercept)              | 0.76 (0.13)   | <.001 | 0.90 (0.11)                  | <.001 | 1.23 (0.15)                 | <.001 | 1298 (198)             | <.001 |
| Heteroplasmy*            | -0.01 (0.02)  | 0.500 | -0.01 (0.01)                 | 0.521 | -0.02 (0.02)                | 0.184 | 1 (23)                 | 0.974 |
| Diabetes                 | -0.29 (0.14)  | 0.042 | -0.09 (0.11)                 | 0.451 | -0.22 (0.16)                | 0.184 | -241 (209)             | 0.262 |
| Heteroplasmy* × Diabetes | 0.08 (0.03)   | 0.014 | 0.02 (0.03)                  | 0.456 | 0.04 (0.04)                 | 0.315 | 72 (48)                | 0.151 |
| Age†                     | 0.06 (0.05)   | 0.247 | -0.08 (0.04)                 | 0.055 | -0.01 (0.06)                | 0.936 | -19 (74)               | 0.804 |
| Male                     | -0.002 (0.07) | 0.978 | -0.04 (0.05)                 | 0.461 | -0.06 (0.08)                | 0.441 | -64 (102)              | 0.536 |
| Black                    | 0.01 (0.06)   | 0.861 | -0.07 (0.05)                 | 0.160 | -0.21 (0.07)                | 0.009 | -124 (96)              | 0.210 |
| BMI†                     | 0.003 (0.01)  | 0.655 | -0.01 (0.01)                 | 0.189 | -0.003 (0.01)               | 0.734 | -12 (11)               | 0.279 |
| Former smoker            | -0.09 (0.09)  | 0.319 | 0.08 (0.07)                  | 0.257 | 0.25 (0.10)                 | 0.022 | 27 (134)               | 0.844 |
| Current smoker           | -0.08 (0.10)  | 0.454 | 0.06 (0.08)                  | 0.511 | 0.25 (0.12)                 | 0.046 | 16 (155)               | 0.918 |

  

|                         | $\beta$ (se)  | p     | $\beta$ (se)  | p     | $\beta$ (se)  | p     | $\beta$ (se) | p     |
|-------------------------|---------------|-------|---------------|-------|---------------|-------|--------------|-------|
| (Intercept)             | 0.60 (0.12)   | <.001 | 0.85 (0.09)   | <.001 | 1.08 (0.13)   | <.001 | 1173 (171)   | <.001 |
| Copy number*            | 0.01 (0.01)   | 0.191 | -0.004 (0.01) | 0.348 | -0.01 (0.01)  | 0.188 | -6 (9)       | 0.513 |
| Diabetes                | 0.04 (0.06)   | 0.553 | -0.01 (0.05)  | 0.772 | -0.07 (0.06)  | 0.266 | -1 (88)      | 0.989 |
| Copy number* × Diabetes | -0.003 (0.01) | 0.836 | 0.01 (0.01)   | 0.647 | 0.02 (0.02)   | 0.302 | 19 (20)      | 0.358 |
| Age†                    | 0.07 (0.05)   | 0.229 | -0.08 (0.04)  | 0.063 | 0.003 (0.06)  | 0.962 | -1 (78)      | 0.987 |
| Male                    | 0.03 (0.08)   | 0.723 | -0.03 (0.06)  | 0.596 | -0.03 (0.09)  | 0.723 | 3 (117)      | 0.981 |
| Black                   | 0.05 (0.07)   | 0.504 | -0.07 (0.05)  | 0.149 | -0.21 (0.07)  | 0.006 | -76 (97)     | 0.441 |
| BMI†                    | 0.003 (0.01)  | 0.714 | -0.01 (0.01)  | 0.240 | -0.002 (0.01) | 0.825 | -10 (12)     | 0.407 |
| Former smoker           | -0.01 (0.09)  | 0.889 | 0.10 (0.07)   | 0.143 | 0.30 (0.10)   | 0.006 | 112 (134)    | 0.411 |
| Current smoker          | -0.07 (0.11)  | 0.536 | 0.06 (0.08)   | 0.474 | 0.27 (0.12)   | 0.035 | 32 (163)     | 0.848 |

\* Heteroplasmy scaled to 10 and copy number centered at 3000 and scaled to 1000. MtDNA copy number is expressed as the ratio between mitochondrial DNA copy number and nuclear DNA copy number.

† Age centered at 70 years and scaled to 10 years, BMI centered at 30.

**Table S5. Coefficients from multivariable linear regression models estimating the association between an indicator for high heteroplasmy count and/or high copy number and ABI as well as measures of walking performance among participants with PAD (n = 33).**

| Coefficient                | ABI          |       | Normal<br>4-meter walk speed |              | Rapid<br>4-meter walk speed |              | 6-minute walk distance |              |
|----------------------------|--------------|-------|------------------------------|--------------|-----------------------------|--------------|------------------------|--------------|
|                            | $\beta$ (se) | p     | $\beta$ (se)                 | p            | $\beta$ (se)                | p            | $\beta$ (se)           | p            |
| (Intercept)                | 0.64 (0.15)  | <.001 | 1.00 (0.09)                  | <.001        | 1.36 (0.13)                 | <.001        | 1470 (190)             | <.001        |
| mtDNA category*            | -0.01 (0.10) | 0.911 | <b>-0.16 (0.06)</b>          | <b>0.020</b> | <b>-0.28 (0.09)</b>         | <b>0.004</b> | <b>-277 (129)</b>      | <b>0.043</b> |
| Diabetes                   | 0.01 (0.13)  | 0.939 | -0.12 (0.08)                 | 0.134        | -0.28 (0.11)                | 0.016        | -192 (160)             | 0.242        |
| mtDNA category* × Diabetes | 0.02 (0.15)  | 0.894 | 0.14 (0.09)                  | 0.160        | 0.28 (0.13)                 | 0.042        | 248 (190)              | 0.206        |
| Age†                       | 0.07 (0.06)  | 0.253 | -0.07 (0.04)                 | 0.055        | 0.01 (0.05)                 | 0.905        | 1 (72)                 | 0.984        |
| Male                       | 0.03 (0.08)  | 0.759 | -0.04 (0.05)                 | 0.385        | -0.06 (0.07)                | 0.378        | -49 (102)              | 0.637        |
| Black                      | 0.04 (0.07)  | 0.583 | -0.09 (0.05)                 | 0.059        | -0.25 (0.06)                | 0.001        | -115 (92)              | 0.225        |
| BMI†                       | 0.01 (0.01)  | 0.588 | -0.01 (0.01)                 | 0.153        | -0.004 (0.01)               | 0.604        | -10 (11)               | 0.345        |
| Former smoker              | -0.02 (0.10) | 0.876 | 0.08 (0.06)                  | 0.223        | 0.24 (0.09)                 | 0.011        | 55 (126)               | 0.667        |
| Current smoker             | -0.07 (0.12) | 0.557 | 0.07 (0.07)                  | 0.335        | 0.29 (0.10)                 | 0.011        | 45 (151)               | 0.766        |

\* A two category variable where low heteroplasmy-low copy number is the reference group, and heteroplasmy count > 36 (median level) or copy number > 3041 (median level) is the alternate category.

† Age centered at 70 years and scaled to 10 years, BMI centered at 30.

Figure S1. Distribution of mtDNA copy number by (A) PAD status and (B) heteroplasmy count among participants with (n = 33) and without PAD (n = 9).

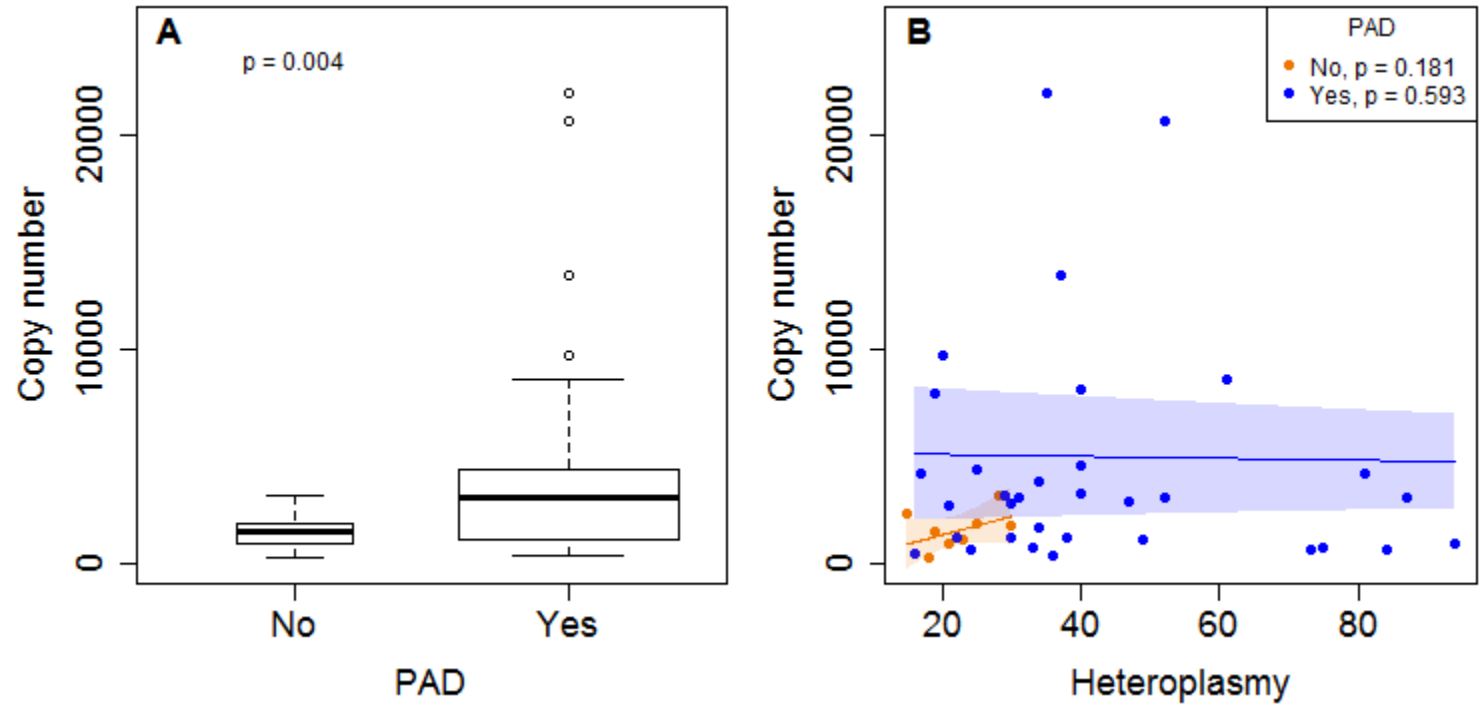

Figure S2. Scatterplots depicting relationships between mtDNA heteroplasmy and ABI, overall and according to mtDNA region in 33 participants with PAD.

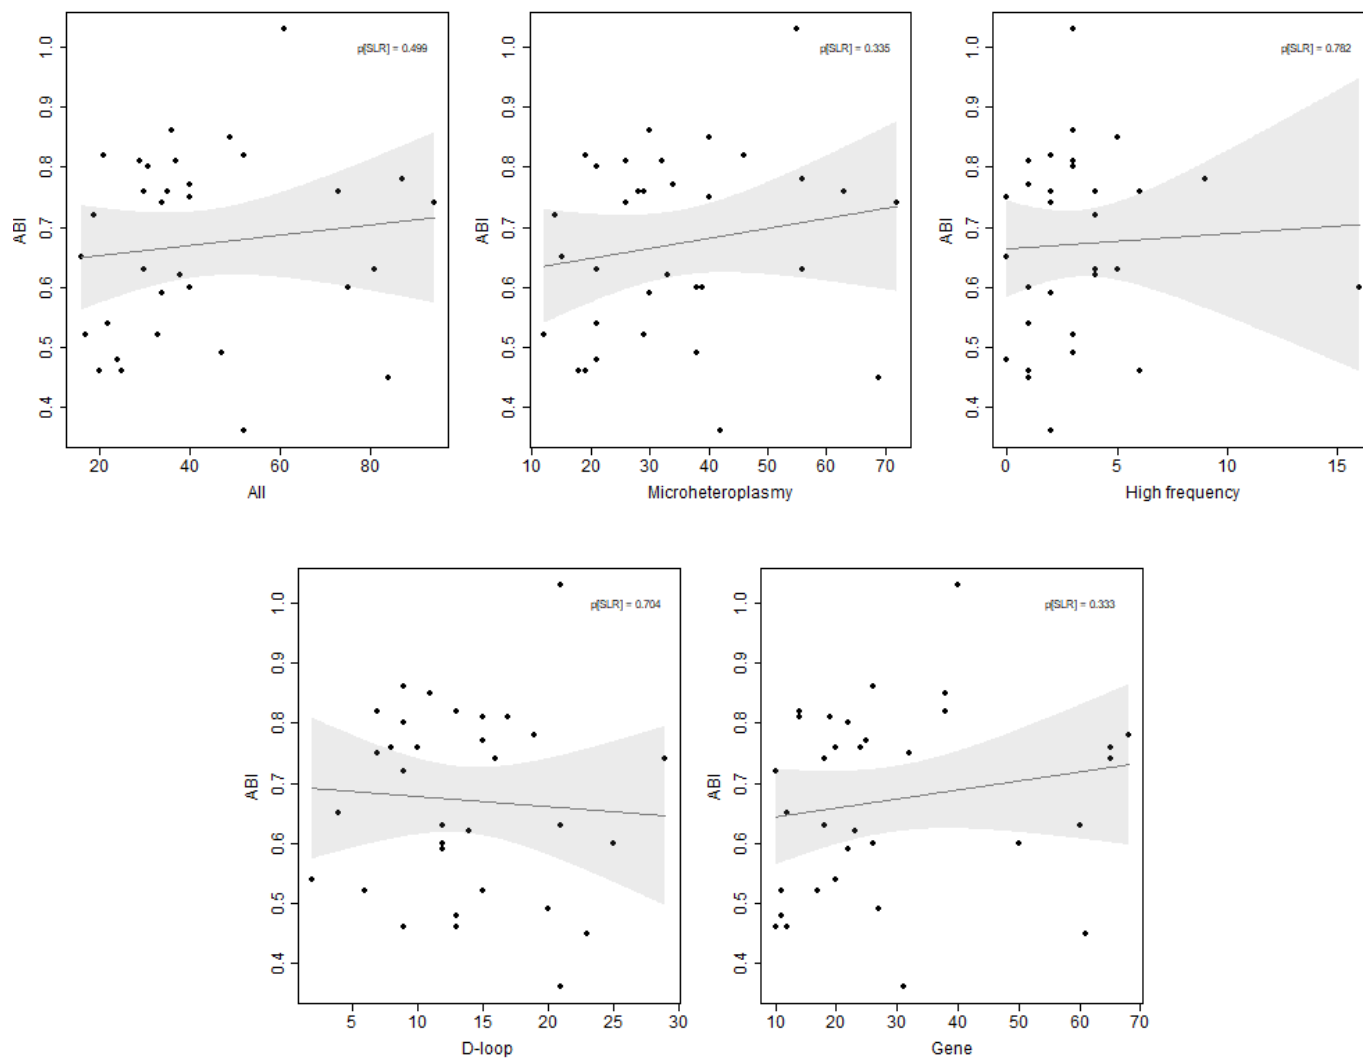



Figure S3. Normal 4-meter walking speed versus heteroplasmy count and mtDNA copy number among participants with PAD (n = 33).

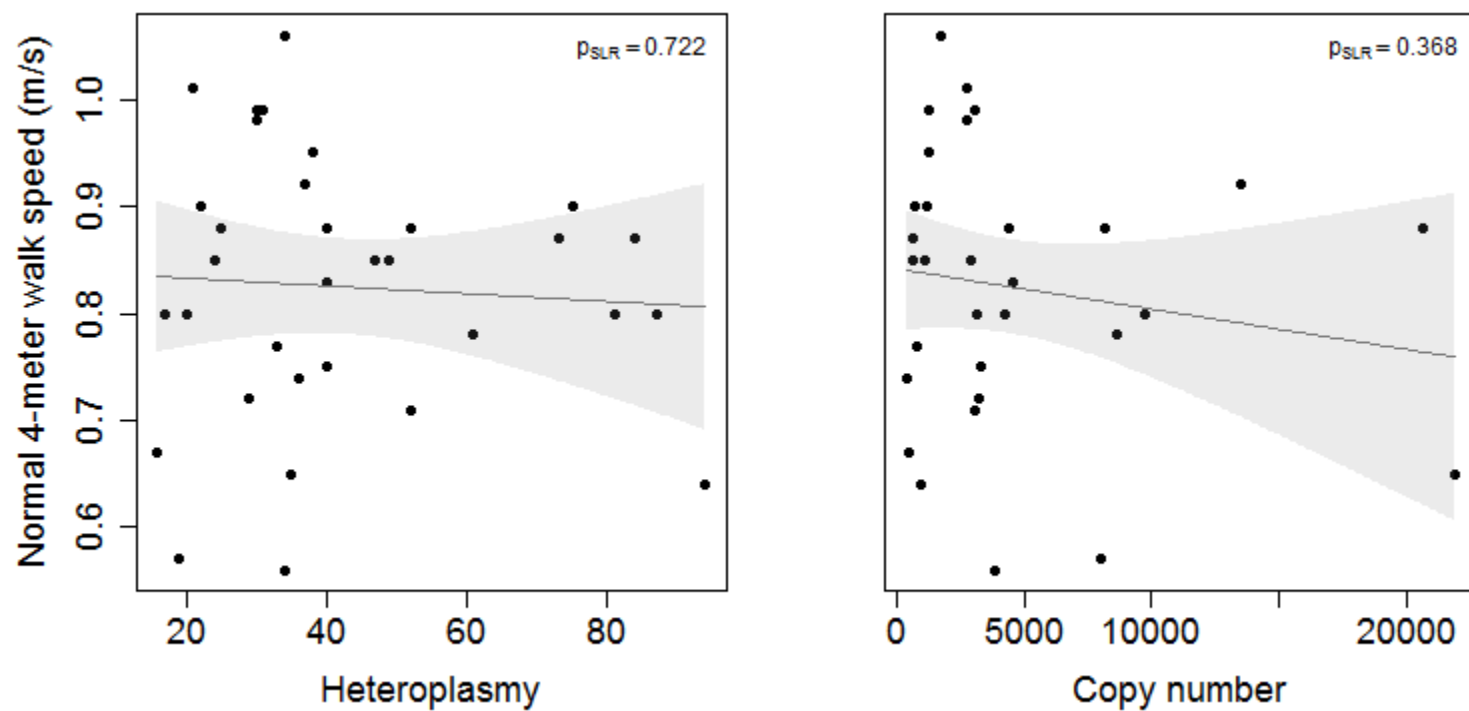

Supplement: JAH3-9-e015197-s002.pdf [file JAH3-9-e015197-s002.pdf]
